# Supplementary material
Source: PubMed Central journal article supplement (PMC1150843)

neoVEH

A.

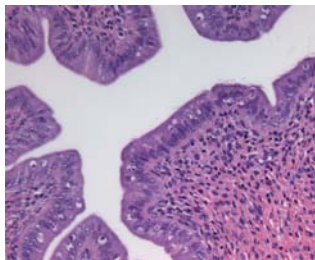

Uterus  
5 months

neoDES

B.

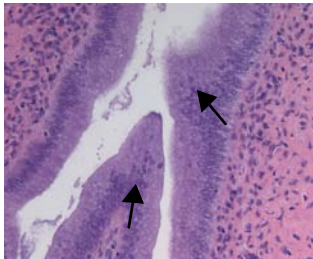

C.

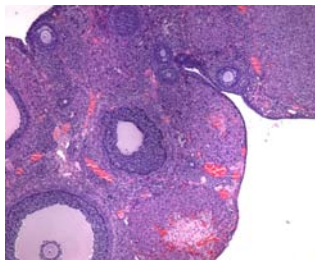

Ovary  
5 months

D.

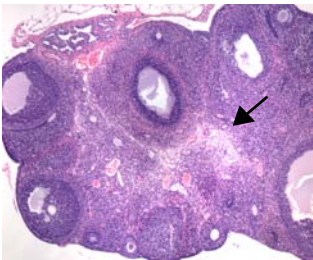

E.

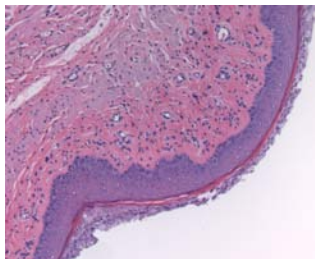

Vagina  
5 months

F.

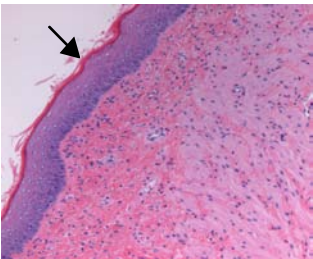

Supplement: pnas_0503218102_1.pdf [file pnas_0503218102_1.pdf]
